# Supplementary material for: A multidimensional comparison of ChatGPT, Google Translate, and DeepL in Chinese tourism texts translation: fidelity, fluency, cultural sensitivity, and persuasiveness
Source: Front Artif Intell. 2025 Jul 24;8:1619489. doi: 10.3389/frai.2025.1619489 (PMC12328331; doi:10.3389/frai.2025.1619489)
Supplement: Supplementary file 1 [file Data_Sheet_1.xlsx]

## Sheet: Sheet1
Chinese Text	Machine Translation Output
1. 中国丝绸博物馆是全国性的丝绸专业博物馆，也是世界上最大的丝绸博物馆。“锦程”展厅内的螺旋型白色楼梯；院内的晓风书屋里有非常多丝绸类书籍和文创产品，复古的氛围很棒；时装馆的室外环形楼梯及天台视野很好……处处都是美好的风景。在千百年前，中国丝绸就以一流的质地和精美绝伦的织样引领着全世界的风尚。这种时尚的起源，离不开西子湖畔的杭州。如今的西湖一隅，这座丝绸博物馆带我们走进丝绸的前世今生。	1. The China National Silk Museum is a national silk museum and the largest silk museum in the world. The spiral white staircase in the "Jincheng" exhibition hall; the Xiaofeng Bookstore in the courtyard has many silk books and cultural products, and the retro atmosphere is great; the outdoor circular staircase and rooftop of the fashion museum have a good view... There are beautiful scenery ever…
	2. The China Silk Museum is a national museum specializing in silk and the largest silk museum in the world. The spiral white staircase in the “Jin Cheng” exhibition hall; the Xiaofeng Bookstore in the courtyard has a lot of silk books and cultural and creative products, with a great retro atmosphere; the outdoor circular staircase and rooftop of the Fashion Museum have a great view ...... everyw…
	3. The China National Silk Museum is a national museum specializing in silk and also the largest silk museum in the world. Inside the "Jincheng" exhibition hall, there is a spiral white staircase; in the Xiaofeng Bookstore within the courtyard, you'll find a wealth of books on silk and creative cultural products, creating a wonderful vintage atmosphere. The outdoor circular staircase and rooftop …
	4. The China National Silk Museum is a premier institution dedicated to silk, earning its place as the largest silk museum in the world. Within the "Jincheng" Exhibition Hall, the elegant spiral white staircase captures the eye, while the Xiaofeng Bookstore in the courtyard offers an impressive collection of silk-related books and creative cultural products, all set in a charmingly vintage ambian…
2. 黄浦江畔的晨曦和夜生活。 在天光破晓时来到黄浦江畔，朝阳才过地平线，喧嚣也尚未袭来，看江鸥飞过天际线，市民沐浴在晨曦下慢跑、放风筝、打太极，外滩安静得令人意外。华灯初上，浦江边的精彩才真正开始。跳上一艘游船，徐徐江风伴随着两岸璀璨夜色，上海的过去和未来迎面扑来。最后，随意挑一间外滩的露台，点上一杯鸡尾酒，在深沉的夜幕里回味这一切。	1. Morning light and nightlife by the Huangpu River. Arrive at the Huangpu River at dawn, when the sun has just passed the horizon and the hustle and bustle has not yet arrived. Watch the river gulls fly across the skyline, and citizens jog, fly kites, and practice Tai Chi in the morning light. The Bund is surprisingly quiet. When the lights come on, the excitement by the Huangpu River really beg…
	2. Morning sun and nightlife on the banks of the Huangpu River. Come to the banks of the Huangpu River at dawn, when the sun is just over the horizon and the hustle and bustle has not yet set in, and watch the gulls fly across the skyline, and the people jogging, flying kites, and playing tai chi under the morning sun, the Bund is surprisingly quiet. When the lights come on, the excitement along …
	3. Morning Light and Nightlife by the Huangpu River Arriving by the Huangpu River at dawn, just as the sun rises above the horizon and the bustle has yet to begin, you can watch seagulls flying across the skyline. Citizens jog, fly kites, and practice Tai Chi, all bathed in the soft morning light. The Bund is surprisingly quiet. As the lights of the city begin to shine, the excitement along the r…
	4. Morning Serenity and Nightlife by the Huangpu River Start your day by the Huangpu River at dawn, when the first light of day gently breaks over the horizon and the city is still asleep. The hustle and bustle haven’t yet arrived, and you can watch seagulls soar across the skyline, while locals, bathed in the soft morning glow, jog, fly kites, or practice Tai Chi in peaceful solitude. The Bund, …
3. 灵隐寺始建于东晋咸和元年（公元326年），至今已有约一千七百年的历史，为杭州最早的名刹。灵隐寺地处杭州西湖以西，背靠北高峰，面朝飞来峰，两峰挟峙，林木耸秀，深山古寺，云烟万状。灵隐寺开山祖师为西印度僧人慧理和尚。他在东晋咸和初，由中原云游入浙，至武林（即今杭州），见有一峰而叹曰：＂此乃中天竺国灵鹫山一小岭，不知何代飞来？佛在世日，多为仙灵所隐。＂遂于峰前建寺，名曰灵隐。	1. Lingyin Temple was first built in the first year of Xianhe in the Eastern Jin Dynasty (326 AD), and has a history of about 1,700 years. It is the earliest famous temple in Hangzhou. Lingyin Temple is located to the west of West Lake in Hangzhou, with Beigao Peak on its back and Feilai Peak in front. The two peaks are flanked by towering trees, ancient temples in the deep mountains, and clouds …
	2. Lingyin Temple was built in the Eastern Jin Dynasty in the first year of Xianhe (326 AD), so far there have been about 1,700 years of history, for Hangzhou's earliest famous temple. Lingyin Temple is located in Hangzhou, west of the West Lake, backed by the North Peak, facing the Feilai Peak, two peaks face each other, forests and trees, deep in the mountains, ancient temples, clouds and smoke…
	3. Lingyin Temple was founded in the first year of the Xianhe era of the Eastern Jin Dynasty (326 AD), boasting a history of approximately 1,700 years and standing as one of Hangzhou’s oldest renowned temples. Situated west of Hangzhou's West Lake, the temple is backed by the North Peak and faces Feilai Peak. The two peaks stand majestically, with lush forests towering around, creating an atmosph…
	4. Lingyin Temple, founded in 326 AD during the first year of the Xianhe era of the Eastern Jin Dynasty, boasts a remarkable history spanning over 1,700 years. As Hangzhou’s oldest and most esteemed Buddhist temple, it holds a place of honor in the city’s cultural heritage. Nestled to the west of Hangzhou's iconic West Lake, Lingyin Temple is embraced by the majestic North Peak at its back and fa…
4. 和平饭店（北楼）…这栋花岗岩建筑在外滩万国建筑中一枝独秀，至今仍是人们心目中体验上海的最佳落脚点。无论是叫沙逊大厦、华懋饭店还是和平饭店，它的Art Deco风格腔调十足，它曾经的主人和它所见证的风流人物和韵事，时常为人津津乐道。和平饭店像一位从摩登时代穿越而来的老绅士，正是上海人口中的“老克勒”，历经岁月洗练，宠辱不惊，90岁高龄依然还有一颗热忱活跃的心。	1. Peace Hotel (North Building)… This granite building stands out among the international buildings on the Bund, and is still the best place for people to experience Shanghai. Whether it is called Sassoon Building, Chinachem Hotel or Peace Hotel, it has a strong Art Deco style. Its former owners and the romantic figures and affairs it has witnessed are often talked about. Peace Hotel is like an o…
	2. Peace Hotel (North Building)... This granite building stands out amongst all the other buildings on the Bund, and is still the best place in the world to experience Shanghai. Whether it's called the Sassoon Building, the Chinachem Hotel or the Peace Hotel, it's Art Deco accents are often talked about by its former owners and the characters and romances it has witnessed. The Peace Hotel is like…
	3. This granite building stands out among the foreign architectural styles along the Bund, and to this day, it remains one of the best places to experience Shanghai. Whether it’s called the Sassoon House, the Huamao Hotel, or the Peace Hotel, its Art Deco design exudes a distinct flair. The stories of its former owners and the many famous personalities and romantic tales it has witnessed are ofte…
	4. The Peace Hotel, a striking granite building on the Bund, stands as a singular gem among the many grand international architectural styles that line this iconic waterfront. Even today, it remains a top destination for those seeking to experience the true spirit of Shanghai. Known by several names throughout its history—Sassoon House, Huamao Hotel, or simply the Peace Hotel—its Art Deco design …
5. 景山公园不仅是供皇族游赏的后花园。也有祭祖、停灵、习射等多种功能。元朝这里就被辟为专供皇帝游赏的御苑。之所以得名 “景山”，除了是帝王“御景”之地外，还取自《诗经》中“陟彼景山，松柏丸丸”之意。制高点万春亭和明清时期所留的辉煌建筑是这里的精华。从故宫神武门出来，越过景山前街可以直接进入景山南门，迎面而来的绮望楼建于清乾隆十五年（1750年），是景山官学堂学生祭拜先师孔子的地方。	1. Jingshan Park is not only a back garden for the royal family to enjoy. It also has many functions such as ancestor worship, funeral, archery practice, etc. In the Yuan Dynasty, it was opened as an imperial garden for the emperor to enjoy. The reason why it is called "Jingshan" is not only because it is the place where the emperor "enjoys the scenery", but also because it is taken from the mean…
	2. Jingshan Park is not only for the royal family to enjoy the back garden. It also has a variety of functions such as ancestor worship, stopping the spirit, and practicing archery. Yuan dynasty here was set up for the emperor to enjoy the imperial garden. The reason why the name “Jingshan”, in addition to the emperor's “imperial view” of the place, but also from the “Poetry” in the “Jingshan, Pi…
	3. Jingshan Park is not only a royal garden for the imperial family but also served various other purposes, including ancestral worship, the placing of the deceased, and archery practice. During the Yuan Dynasty, it was designated as an imperial garden exclusively for the emperor's leisure. The name "Jingshan" is derived from both its role as the emperor’s “royal view” and a line from the Book of…
	4. Jingshan Park is more than just a tranquil garden for royal leisure—it served various significant purposes throughout history, from ancestral rites to resting the deceased and even archery practice. During the Yuan Dynasty, it was specifically designated as an imperial garden for the emperor’s enjoyment. The name "Jingshan" (Scenic Hill) not only refers to its role as a royal "viewing point" b…
6. 豫园始建于明嘉靖年间，最初是四川布政使潘允端的私家园林。取名“豫园”是源于当时倭寇刚平息，“豫”有安适之意，潘允端修建此园主要是为了让父亲安享晚年。第一次鸦片战争爆发时，豫园遭到大肆破坏，后来又成为小刀会的临时军营，起义失败后豫园再度惨遭破坏，园内很多精美建筑付之一炬，直到新中国成立后，进行了多次大规模修缮，才得以恢复昔日的光彩。	1. Yu Garden was first built during the Jiajing period of the Ming Dynasty. It was originally the private garden of Pan Yunduan, the governor of Sichuan. The name "Yu Garden" came from the fact that the Japanese pirates had just been pacified at that time. "Yu" means comfort. Pan Yunduan built this garden mainly for his father to enjoy his old age. When the First Opium War broke out, Yu Garden wa…
	2. The Yuyuan Garden was built during the Jiajing period of the Ming Dynasty, and was originally the private garden of Pan Yunduan, the Minister of Sichuan Province. The name “Yu Garden” originated from the fact that the Japanese invasion had just subsided, and the word “Yu” means comfort, so Pan Yunduan built the garden mainly for his father to enjoy his old age peacefully. At the outbreak of th…
	3. Yu Garden was originally constructed during the Ming Dynasty under the reign of Emperor Jiajing, and it was initially a private garden owned by Pan Yunduan, the Governor of Sichuan. The name "Yu Garden" was chosen in reference to the recent defeat of the Japanese pirates (Wokou) at the time, with "Yu" meaning peace and comfort. Pan Yunduan built the garden mainly to provide a peaceful and comf…
	4. Yuyuan Garden, originally constructed during the Ming Dynasty under the reign of Emperor Jiajing, was the private garden of Pan Yunduan, the governor of Sichuan. The name "Yuyuan" (meaning "Garden of Peace") was inspired by the peace that followed the defeat of the Wokou pirates, symbolizing tranquility. Pan Yunduan built this serene retreat primarily for his father, so he could enjoy a comfor…
7. 鱼乐榭。小巧的临水亭台得名于惠子的“子非鱼安知鱼之乐”，这处精致的小景充分发挥了园林的借景和空间艺术。前方一条窄窄的溪水被一堵粉墙隔断，墙下又开半圆洞门，通过水面倒映出部分墙后的景物，令人对视线之外产生无限遐想。左侧有一条复廊—一走廊中间以墙分隔，墙上开有形状各异的漏窗。亭旁还有一株超过300年的紫藤，每逢初春，白色的小花缀满枝头。亭后又以一面大镜子完全“复制”眼前的景色，当你站在亭中，无论前看后望，景色都一样，形成亭前亭后呼应的效果。	1. The small pavilion by the water in Yule Pavilion is named after Huizi's "How can you know the joy of fish if you are not a fish?" This exquisite small scene fully demonstrates the borrowed scenery and spatial art of the garden. A narrow stream in front is separated by a white wall, and a semicircular hole door is opened under the wall. Part of the scenery behind the wall is reflected through t…
	2. The small waterfront pavilion is named after Huizi's “A man who is not a fish knows the joy of a fish”, and this delicate little scene gives full play to the garden's art of borrowing scenery and space. A narrow stream in front of the pavilion is separated by a pink wall, under which a semi-circular door is opened, reflecting part of the scenery behind the wall through the water surface, givin…
	3. The name "Yule Pavilion" comes from the famous phrase by Hui Zi: "You are not a fish, how can you know the joy of fish?" This small, exquisite landscape element fully utilizes the artistic techniques of borrowing scenery and spatial design typical in Chinese gardens. In front of the pavilion, a narrow stream is separated by a pink wall, which features a semicircular opening at the bottom. Thro…
	4. The Yule Pavilion, a charming little structure by the water, takes its name from the famous philosophical saying by Hui Zi: "You are not a fish, how can you know the joy of fish?" This delicate landscape is a perfect example of how traditional Chinese gardens use the art of "borrowed scenery" and spatial design to create an atmosphere of contemplation and beauty. In front of the pavilion, a na…
8. 中华人民共和国成立后，跑马厅于1952年被改建为人民公园。公园内栽满树木，修建花坛，小径上时有市民慢跑和野餐，已然是上海市民日常的风景。在春夏之交，公园的月季花大量绽放，西侧荷花池则在盛夏开得正好，都吸引了不少“好摄之徒”前来取景。人民公园的英语角已成往事，但“相亲角”依然是沪上亮丽的风景线，也是奇闻逸事和婚恋金句的出处，路过就不要错过。	1. After the founding of the People's Republic of China, the Racecourse was converted into People's Park in 1952. The park is full of trees and flower beds, and citizens jog and picnic on the trails, which has become a daily scene for Shanghai citizens. At the turn of spring and summer, the roses in the park bloom in large numbers, and the lotus pond on the west side blooms in midsummer, attracti…
	2. After the founding of the People's Republic of China, Happy Valley was transformed into People's Park in 1952. The park is filled with trees, flower beds are constructed, and the paths are sometimes filled with people jogging and picnicking, and has become a daily landscape for Shanghai citizens. In spring and summer, the park's moonflowers bloom in abundance, and the lotus pond on the west si…
	3. After the founding of the People's Republic of China, the former Racecourse was transformed into People's Park in 1952. The park is filled with trees and flower beds, with pathways where local residents often jog or picnic, becoming an integral part of daily life in Shanghai. In late spring and early summer, the park’s rose garden blooms in abundance, while the lotus pond on the western side r…
	4. After the founding of the People’s Republic of China, the former horse racing track was transformed into People’s Park in 1952. Today, this lush green space, with its trees, flowerbeds, and winding paths, is a beloved part of daily life for the people of Shanghai. Whether it's joggers along the trails or families enjoying a picnic, the park provides a peaceful escape from the city's hustle and…
9. 故宫，这座明清两代的皇宫里，有中国最高规格的建筑形式，也有成千上万的稀世珍宝。600多年的历史在中国古建筑中不算太悠久，但地处北京中心地带，保存完整的宫廷建筑和封建王朝最后一个皇宫的政治意义，造就了故宫独一无二的地位。信步在高高的红墙间，你可以按照清宫戏里的编排，到各“小主”的住所一探究竟；也可以透过金丝楠木的窗棂，想象几百年来发生在这里的爱恨悲欢、运筹帷幄和皇位更替的故事。冬雪中披上银装的金瓦红墙庄重又唯美。	1. The Forbidden City, the imperial palace of the Ming and Qing dynasties, has the highest architectural style in China and thousands of rare treasures. The history of more than 600 years is not too long among ancient Chinese buildings, but the Forbidden City is located in the center of Beijing, with well-preserved palace buildings and the political significance of the last imperial palace of the…
	2. The Forbidden City, the imperial palace of the Ming and Qing dynasties, is home to China's highest architectural standards and thousands of rare treasures. 600 years of history is not too long for Chinese ancient architecture, but its location in the center of Beijing, its well-preserved palace architecture and the political significance of being the last palace of the feudal dynasty have crea…
	3. The Forbidden City, home to the emperors of the Ming and Qing dynasties, is a symbol of China’s highest architectural standards and a repository of countless priceless treasures. With a history spanning over 600 years, it may not be the oldest among China’s ancient structures, but its location at the heart of Beijing and its status as the final imperial palace of the feudal era give it unparal…
	4. The Forbidden City, the grand imperial palace of the Ming and Qing dynasties, is home to China’s finest architectural masterpieces and countless priceless treasures. While its more than 600 years of history may not seem exceptionally ancient in the context of China’s ancient buildings, its location at the heart of Beijing, along with its well-preserved imperial structures and role as the last …
10. 三星堆和金沙遗址的发掘在中国考古史上掀起滔天巨浪，它们揭开了蜀地远古文明的神秘面纱，将长江流域文明上推至与黄河流域文明相等的五千年，也让“不与秦塞通人烟”的传说成为过去时。不要错过广汉三星堆博物馆和金沙遗址博物馆，壮观的通天神树、奇异的青铜纵目面具和精美的太阳神鸟金箔，每一样都足以攫人目光。	1. The excavation of Sanxingdui and Jinsha sites has set off a huge wave in the history of Chinese archaeology. They have unveiled the mystery of the ancient Shu civilization, pushed the civilization of the Yangtze River Basin back to the same age of 5,000 years as the civilization of the Yellow River Basin, and made the legend of "no human traffic with the Qin Pass" a thing of the past. Don't mi…
	2. The excavation of the Sanxingdui and Jinsha Ruins created a huge wave in Chinese archaeological history, unveiling the mystery of the ancient civilization of Shu, pushing the civilization of the Yangtze River Valley to 5,000 years equal to the civilization of the Yellow River Basin, and making the legend of “not communicating with the people of the Qin Seas” a thing of the past. Don't miss the…
	3. The discoveries at the Sanxingdui and Jinsha archaeological sites have created a monumental wave in the history of Chinese archaeology. These sites have uncovered the mysteries of the ancient Shu civilization, pushing the timeline of the Yangtze River valley’s history back to 5,000 years, placing it on par with the ancient civilizations of the Yellow River valley. They have also put to rest th…
	4. The excavations at the Sanxingdui and Jinsha sites have sent shockwaves through the history of Chinese archaeology. They have uncovered the long-hidden mysteries of the ancient Shu civilization, extending the history of the Yangtze River valley to a remarkable 5,000 years, placing it on equal footing with the legendary Yellow River civilization. These discoveries also put to rest the myth that…
11. 唐朝人曾说“蜀中多仙山，峨眉邈难匹”。不过对于21世纪人，探访雪山才够范儿。大雪山脉的主峰贡嘎山是“7000+”雪山中最靠东的一座，“蜀山之王”的气势值得你远涉朝拜。四姑娘山幺妹峰是他的“皇后”，亭亭玉立在“熊猫王国”上空，其他三座姑娘峰则适合登山爱好者一步步进阶。三大菩萨化身为亚丁三神山，有着壮美的雪峰、清新的花木和神奇的海子，仿佛是另一个版本的香格里拉。	1. People in the Tang Dynasty once said, "There are many fairy mountains in Shu, and Emei Mountain is unmatched." However, for people in the 21st century, visiting snow-capped mountains is the most fashionable. Gongga Mountain, the main peak of the Daxue Mountain Range, is the easternmost of the "7000+" snow-capped mountains. The momentum of the "King of Shu Mountains" is worth your pilgrimage. Y…
	2. The Tang Dynasty once said, “There are many immortal mountains in Shu, and Emei is hard to match”. But for the 21st century, visiting snow-capped mountains is the way to go. The main peak of the Daxue Mountain Range, Mount Gongga, is one of the most eastward of the “7000+” snow mountains, and the “King of the Shu Mountains” is worth a long pilgrimage to pay homage to. Siguniangshan Missy Peak …
	3. As the Tang Dynasty poets once said, “Sichuan is home to many immortal mountains, but none can rival the distant grandeur of Mount Emei.” However, for the 21st-century traveler, there’s nothing quite like exploring the towering snow-capped peaks of the Greater Snow Mountains. Gongga Mountain, the easternmost peak in the "7000-meter+" snow mountain range, stands proudly as the “King of the Shu …
	4. In ancient times, poets from the Tang Dynasty extolled the immortal mountains of Sichuan, with Mount Emei standing as the unparalleled jewel of the region. Yet, for the modern traveler of the 21st century, there’s no greater adventure than exploring the towering snow-capped peaks of Sichuan's Greater Snow Mountain Range. Gongga Mountain, the highest peak in this range and the easternmost of th…
12. 当北方及中原的佛教艺术在两宋时期走向衰落时，巴蜀大地却为中国保存了唐宋石窟的盛世风貌，从安岳石刻到大足石刻群，在继承了北方云冈、龙门等皇家石窟风格的同时，随着密宗的兴起，石窟题材焕然一新，尤其是大足石刻，既有宛如宋代社会世相展览的宝顶山石刻，也有以观音造像见长的北山石刻，以及儒、释、道三教合一的南山、石门山、石篆山石刻群，它们就仿佛是中国石窟文化下半阕的高光部分，值得你一探究竟。	1. When Buddhist art in the north and the Central Plains declined during the Song Dynasty, the land of Bashu preserved the heyday of Tang and Song Dynasty grottoes for China. From Anyue Rock Carvings to Dazu Rock Carvings, while inheriting the style of the royal grottoes such as Yungang and Longmen in the north, with the rise of Tantric Buddhism, the grotto themes have been completely renewed, es…
	2. While Buddhist art in the north and central China declined during the Song Dynasty, Bashu preserved for China the flourishing style of Tang and Song Dynasty grottoes. From Anyue Rock Carvings to Dazu Rock Carvings, while inheriting the style of royal grottoes in the north, such as Yungang and Longmen, the theme of grottoes has been renewed with the emergence of Tantric Buddhism, especially Daz…
	3. During the decline of Buddhist art in northern and central China during the Song Dynasty, the Bashu region preserved the grandeur of Tang and Song Dynasty grotto art for China. From the Anyue Stone Carvings to the Dazu Rock Carvings, these sites not only inherited the imperial styles of northern grottoes like Yungang and Longmen but also revitalized their themes with the rise of Esoteric Buddh…
	4. While Buddhist art in northern and central China experienced decline during the Song Dynasty, the Bashu region (modern-day Sichuan and Chongqing) preserved the grandeur of Tang and Song-era grotto art. From the Anyue Stone Carvings to the Dazu Rock Carvings, this region not only inherited the royal grotto style seen in northern sites like Yungang and Longmen but also embraced new themes inspir…
13. 当人们流连于千姿百态的峰丛、石林和溶洞等喀斯特风景时，在重庆的地底却深藏着世界级别的喀斯特地貌群，它们在近年才被中外探险家揭开神秘面纱。如今旅行者可以轻松造访武隆天生三桥、龙水峡地缝和奉节小寨天坑、天井峡地缝，不过用相机很难拍摄下它们的壮观与神奇，你最好是静静地走进去，欣赏这难得一见的巨型天坑、地缝，或者尝试以极限运动的方式下降至深不可测的竖井。	1. While people are lingering in the karst landscapes of various shapes and sizes, such as peaks, stone forests and caves, there are world-class karst landforms hidden deep underground in Chongqing, which have only been unveiled by Chinese and foreign explorers in recent years. Today, travelers can easily visit Wulong Tiansheng Three Bridges, Longshuixia Ground Crack, Fengjie Xiaozhai Tiankeng, a…
	2. While people linger over the karst landscapes of peaks, rock forests and caves, there are world-class karst formations hidden deep beneath the ground in Chongqing, which have only been unveiled by Chinese and foreign explorers in recent years. Nowadays travelers can easily visit Wulong Tiansheng Three Bridges, Longshui Gorge Seams and Fengjie Xiaozhai Sinkhole, Tianjing Gorge Seams, but it's h…
	3. While people marvel at the diverse karst landscapes of peaks, stone forests, and limestone caves, beneath the city of Chongqing lies a world-class karst geological wonder that has only recently been uncovered by explorers from both China and abroad. Today, travelers can easily visit stunning sites such as Wulong’s Tianxing Three Bridges, Longshui Gorge’s Earth Rift, and Fengjie’s Xiaozhai Tian…
	4. While travelers marvel at the stunning karst landscapes of peaks, stone forests, and caves, beneath Chongqing lies a hidden treasure: a world-class karst geomorphology cluster. Only recently unveiled by explorers from China and abroad, these geological wonders now await your discovery. Visitors can easily explore breathtaking sites such as the Wulong Three Natural Bridges, the Longshuixia Fiss…
14. 起伏的山峦间，高耸翠廊指引南北方向，蔽日浮云般的参天古柏矗立两侧，斑驳青石板路蜿蜒其下，犹见马匹嘚嘚、车轴辘辘的千年印迹。沿途剑门、天雄等关口，或巍峨耸立猩红绝崖间，或半颓半倾漫草中；阆中、昭化等古镇，金戈铁马的往事，至今回荡在青瓦和风水间。最终，道路在横亘川陕甘的秦岭和巴山，化身难于上青天的崖壁栈道，只留下千佛尊尊，见证古蜀道上历代文人、将士甚至皇帝往来蜀地和长安的如烟往事。	1. Among the undulating mountains, towering green corridors point to the north and south, towering ancient cypresses stand on both sides, and mottled bluestone roads meander below, with traces of the clatter of horses and the rumbling of axles still visible for thousands of years. Along the way, the passes such as Jianmen and Tianxiong stand majestically between scarlet cliffs or half-collapsed a…
	2. Between the undulating mountains, towering cui corridor guides the direction of north and south, sun-shaded floating clouds like sky-high cypresses stand on both sides, mottled green stone road meandering down, as if to see the horse de de de, axle reel of the thousand years of traces. Along the way Jianmen, Tianxiong and other passes, or towering scarlet cliffs, or half decadent half tilted i…
	3. Amidst the undulating mountains, towering green corridors stretch north and south, flanked by ancient cypress trees that soar skyward like clouds blocking the sun. Beneath them winds a weathered bluestone path, still bearing the echoes of horses' hooves and the creaking wheels of carts from centuries past. Along the way, passes like Jianmen and Tianxiong stand tall, either dramatically nestled…
	4. Amidst the undulating mountain ranges, towering green corridors stretch north and south, flanked by ancient cypress trees that soar skyward like clouds blotting out the sun. Beneath them, a weathered stone path winds its way through the landscape, bearing the echoes of centuries-old hoofbeats and the creak of wagon wheels. Along the route, fortresses like Jianmen and Tianxiong stand tall, some…
15. 成都饮食可谓食不厌精，贡献了无数鼎鼎大名的菜品，像麻婆豆腐、回锅肉、宫保鸡丁、东坡肘子、咸烧白、粉蒸肉、夫妻肺片、蚂蚁上树、蒜泥白肉、口水鸡、樟茶鸭子、鱼香肉丝、泉水豆花、干煸四季豆、盐煎肉等，已经成了全球食客都耳熟能详的菜肴。不妨在街边找一家“苍蝇馆子”，尝尝当地人最喜爱的家常菜。	1. Chengdu cuisine is very refined, and has contributed countless famous dishes, such as Mapo Tofu, Twice-cooked Pork, Kung Pao Chicken, Dongpo Pork Knuckle, Salty Shaobai, Steamed Pork with Rice Flour, Husband and Wife Feipian, Ants Climbing a Tree, Garlic Pork, Chicken with Mouth Water, Camphor Tea Duck, Shredded Pork with Fish Flavor, Spring Water Tofu, Stir-fried French Beans, and Salt-fried …
	2. Chengdu's cuisine has contributed to countless famous dishes, such as Mapo Tofu, Sichuan Style Pork, Kung Pao Chicken, Dongpo Elbow, Salted White Pork, Steamed Pork, Sliced Lungs for Husband and Wife, Ants on a Tree, White Pork with Garlic Mud, Mouthwatering Chicken, Camphor Tea Duck, Shredded Pork with Fish Flavors, Spring Bean Pudding, Stir-Fried Four Season Beans, and Pan-Fried Pork with Sa…
	3. Chengdu’s cuisine epitomizes the pursuit of culinary perfection, contributing countless renowned dishes to Chinese gastronomy. Iconic dishes such as Mapo Tofu, Twice-Cooked Pork, Kung Pao Chicken, Dongpo Pork Hock, Salted Pork Belly, Steamed Pork with Rice Flour, Husband-and-Wife Lung Slices, Ants Climbing a Tree, Garlic Pork, Mouthwatering Chicken, Tea-Smoked Duck, Fish-Fragrant Shredded Pork…
	4. Chengdu cuisine epitomizes the art of refined cooking, boasting an impressive array of world-renowned dishes that have become staples for food lovers everywhere. Signature dishes like Mapo Tofu, Twice-Cooked Pork, Kung Pao Chicken, Dongpo Pork Hock, Salted Pork Belly, Steamed Pork with Rice Flour, Husband and Wife Lung Slices, Ants Climbing a Tree, Garlic Pork Slices, Mouthwatering Chicken, Ca…
16. 彝族人视银饰为美和富有的象征，大量使用于装点服饰、生活器皿乃至祭司法器。其中布拖县被誉为“银饰之乡”，当地除了传统银饰外，还有用于装饰帽子、衣领的特有银饰。彝族漆器则多是生活餐具和酒具，以天然颜料漆绘，黑为底色，红、黄两色图纹装点，特色鲜明。此外，以孔雀石配方烧制的会理绿陶和雕工精美的攀枝花苴却砚是省级非物质文化遗产。	1. The Yi people regard silver ornaments as a symbol of beauty and wealth, and use them extensively to decorate clothing, daily utensils, and even sacrificial instruments. Butuo County is known as the "hometown of silver ornaments". In addition to traditional silver ornaments, there are also unique silver ornaments used to decorate hats and collars. Yi lacquerware is mostly tableware and wine ute…
	2. The Yi people regard silver jewelry as a symbol of beauty and wealth, and it is used in a large number of costumes, household utensils and even priestly instruments. Butuan County is known as the “Township of Silver Jewelry”, where, in addition to traditional silver jewelry, there are also unique silver ornaments used to decorate hats and collars. Yi lacquerware is mostly tableware and drinkin…
	3. The Yi people regard silver jewelry as a symbol of beauty and wealth, using it extensively to decorate clothing, household items, and even ritual vessels. Among these, Butuo County is known as the "Home of Silver Jewelry," where, in addition to traditional silver ornaments, there are unique silver decorations used for embellishing hats and collars. Yi lacquerware is primarily used for daily ut…
	4. To the Yi people, silver ornaments are symbols of beauty and prosperity. These intricate creations are widely used to embellish clothing, household items, and even ritual tools. Butuo County, often referred to as the "Land of Silver," is renowned for its traditional silver craftsmanship. In addition to classic silver accessories, the region is known for unique silver pieces designed to decorat…
17. 青羊宫被誉为“川西第一道观”，是成都现存年代最久、规模最大的道教宫观。据史料记载，老子骑青牛出函谷关时，曾对关令尹喜说：“子行道千日后，于成都青羊肆寻吾。”青羊肆便是今日青羊宫所在。每年农历二月十五（老子生日），观中都会举行盛大庙会庆典。道观始建于西周，唐僖宗时大修，明末毁于战火，现存建筑多为清康熙年间重修。	1. Qingyang Palace is known as the "No. 1 Taoist Temple in Western Sichuan". It is the oldest and largest Taoist temple in Chengdu. According to historical records, when Laozi rode a green bull out of Hangu Pass, he said to the guard Yin Xi: "After you have practiced Taoism for a thousand days, come and find me at Qingyangsi in Chengdu." Qingyangsi is where Qingyang Palace is today. Every year on…
	2. Qingyang Palace is known as “the first Taoist temple in western Sichuan” and is the oldest and largest Taoist temple in Chengdu. According to historical records, when Laozi rode a green ox out of the Hangu Pass, he once told Yin Xi, the commander of the Pass, “After traveling for a thousand days, he will look for me at the Qingyang Temple in Chengdu.” The Qingyang Temple is where the Qingyang …
	3. Qingyang Palace is renowned as the "First Daoist Temple in Western Sichuan" and is the oldest and largest Daoist temple still standing in Chengdu. According to historical records, when Laozi rode a green ox out of the Hangu Pass, he told the pass's guardian, Yin Xi: "After traveling the Dao for a thousand days, you will find me in the Qingyang market of Chengdu." The Qingyang market is the loc…
	4. Qingyang Palace, often hailed as the "Premier Taoist Temple of Western Sichuan," is the oldest and largest Taoist complex in Chengdu. Historical records recount that when Laozi, the founder of Taoism, rode his green ox out of Hangu Pass, he told the gatekeeper Yin Xi: "After traveling the Way for a thousand days, seek me at Qingyang Market in Chengdu." That ancient market is now the site of Qi…
18. 唐乾元二年（759年），杜甫为避安史之乱，弃官入蜀，在亲友资助下于浣花溪畔建立草堂。他在此寓居4年，留下诗作240余篇，让草堂从此走入中国文学史。事实上，“八月秋高风怒号，卷我屋上三重茅”中的茅屋早已消逝，今日的草堂与其说是杜甫的故居，不如说是后人重建的纪念碑。“朝圣”完茅屋故居后若有雅致，可以在占地广阔的园林区走走，里头环境清幽，小桥流水、假山瀑布与“蓬门”“花径”一应俱全。	1. In the second year of the Qianyuan Period of the Tang Dynasty (759), Du Fu abandoned his official post and went to Sichuan to avoid the An-Shi Rebellion. With the help of his relatives and friends, he built a thatched cottage by the Huanhua Creek. He lived here for four years and left more than 240 poems, which made the thatched cottage enter the history of Chinese literature. In fact, the tha…
	2. In the second year of Qianyuan of the Tang Dynasty (759), Du Fu abandoned his official post and went to Shu to avoid the Anshi Rebellion, where he established the Caodang on the banks of the Raccoon River with the financial support of his friends and relatives. He lived here for four years, leaving behind more than 240 poems, which brought the Hall into the history of Chinese literature. As a …
	3. In the second year of the Qianyuan era (759 AD) during the Tang Dynasty, to escape the An-Shi Rebellion, the poet Du Fu abandoned his official position and moved to Sichuan. With the help of friends and relatives, he built a thatched cottage by the Huanhua Creek. He lived there for four years, during which he wrote over 240 poems, making the cottage an important landmark in Chinese literary hi…
	4. In the second year of the Qianyuan era (759 AD) during the Tang Dynasty, renowned poet Du Fu fled the chaos of the An-Shi Rebellion and journeyed to Sichuan. With financial support from friends and family, he built a humble thatched cottage along the serene Huanhua Creek. During his four years of residence, Du Fu composed over 240 poems, immortalizing the site in Chinese literary history. The …
19 日益增多的游客和水泥混凝土建筑的出现并没有对泸沽湖造成大碍，这一泓如蓝宝石般深邃的净水，依然在川滇高原上遗世独立。起伏的地势造就了独有的草海湿地和令人陶醉的湖湾景致，众多尚未开发的摩梭村寨让古老的摩梭母系文化保留得更加古朴和完整。寻常的观光旅游无法尽窥它的精彩之处，让背包减负，踩一双好鞋，远离人群，翻越后龙山脊，漫步山间小道，造访原始村落，登上女神山，深入阿夏幽谷，你会发现泸沽湖引人入胜的另一面。	1. The increasing number of tourists and the emergence of cement and concrete buildings have not caused much trouble to Lugu Lake. This pool of pure water, as deep as a sapphire, still stands alone on the Sichuan-Yunnan Plateau. The undulating terrain has created a unique grass sea wetland and an intoxicating lake bay scenery. The many undeveloped Mosuo villages have preserved the ancient Mosuo m…
	2. The increasing number of tourists and the emergence of cement and concrete buildings have not caused any major obstacles to Lugu Lake, a vast expanse of pure water as deep as a sapphire, still in the Sichuan-Yunnan plateau of the world. The undulating terrain has created the unique grass sea wetlands and mesmerizing lake scenery, and the many undeveloped Mosuo villages have preserved the ancie…
	3. The increasing number of tourists and the appearance of concrete buildings have not caused much harm to Lugu Lake. This sapphire-blue, crystal-clear water still stands independently on the Sichuan-Yunnan Plateau. The undulating terrain has created unique grassland wetlands and enchanting bay views. Numerous undeveloped Mosuo villages have preserved the ancient Mosuo matriarchal culture in a mo…
	4. The growing number of visitors and the emergence of concrete buildings have not marred the pristine beauty of Lugu Lake. Like a sapphire embedded in the highlands of Sichuan and Yunnan, it remains an unspoiled natural wonder. The undulating terrain gives rise to unique grassland wetlands and enchanting bays, while the untouched Mosuo villages preserve the ancient and authentic matriarchal cult…
20. 杭州有“丝绸之府”之称。距今四千七百年的良渚出土丝织物就已揭示了杭州丝绸的历史之久，唐代大诗人白居易“丝袖织绫夸柿蒂，青旗沽酒趁梨花”的诗句又道出了当时杭州丝绸的水准之高，旧时清河坊鳞次栉比的绸庄更见证了丝绸经济的繁荣。	1. Hangzhou is known as the "Silk City". The unearthed silk fabrics from Liangzhu, which date back 4,700 years, have revealed the long history of Hangzhou silk. The poem by the great Tang Dynasty poet Bai Juyi, "Silk sleeves weave silk to praise persimmon calyx, green flags sell wine to take advantage of pear blossoms", also shows the high level of Hangzhou silk at that time. The silk shops lined…
	2. Hangzhou is known as the “Silk House”. Four thousand seven hundred years ago, Liangzhu unearthed silk fabrics have revealed the long history of Hangzhou silk, the Tang Dynasty poet Bai Juyi “silk sleeve weaving damask qua persimmon, the green flag wine while the pear blossom,” the poem and said the high standard of Hangzhou silk, the old days of Qinghefang lined up of Silk Village more witness…
	3. Hangzhou is known as the "Capital of Silk." The discovery of silk textiles from the Liangzhu culture, dating back 4,700 years, reveals the long history of silk production in Hangzhou. The famous Tang Dynasty poet Bai Juyi, in his line "Silk sleeves weave brocade to boast of persimmon stems, while the green flags sell wine beneath the pear blossoms," also speaks to the high quality of Hangzhou …
	4. Hangzhou is renowned as the "City of Silk," a title that reflects its rich and enduring connection to the art of silk production. Archaeological discoveries from the Liangzhu Culture, dating back 4,700 years, reveal the ancient origins of silk weaving in this region. During the Tang Dynasty, the esteemed poet Bai Juyi captured the high quality of Hangzhou silk in his verse: “Silk sleeves woven…
